# Supplementary material for: Photodesorption mechanism of water on WO3(001) – a combined embedded cluster, computational intelligence and wave packet approach
Source: Royal Society of Chemistry journal article supplement (doi:10.1039/d0cp02809f), 2020-01-01
Supplement: d0cp02809f2.pdf [file d0cp02809f2.pdf]

# Photo-oxidation Mechanism of Water on $\text{WO}_3(001)$ - A combined Embedded Cluster, Machine Learning and Wave Packet Approach

T. Teusch, T. Klüner

Carl von Ossietzky University, Oldenburg, Germany

## S1 Supporting Information

### S1.1 Basis set

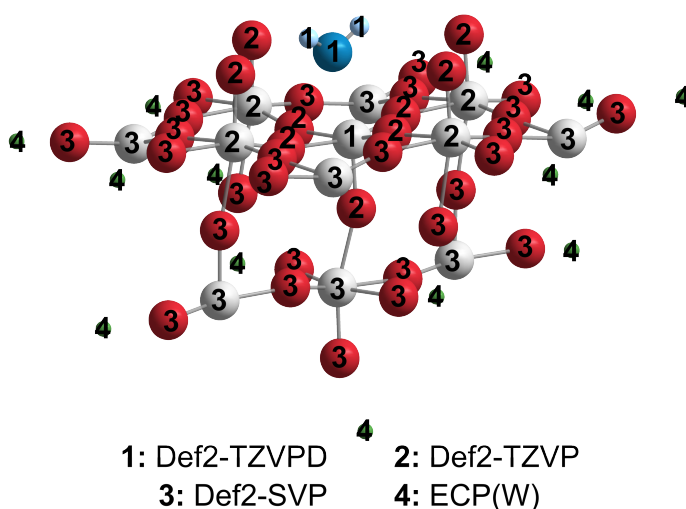

Figure S1: Assignment of the different basis sets on each atom within the cluster model.

### S1.2 Grid for each jacobian coordinate

Table S1: Grid for each jacobian coordinate.

| Jacobian Coordinate  | Value range                                                                                                                                                                                                                                                         |
|----------------------|---------------------------------------------------------------------------------------------------------------------------------------------------------------------------------------------------------------------------------------------------------------------|
| $\vartheta / ^\circ$ | 0, 24, 48, 54.54, 72, 96, 120, 144, 168, 180                                                                                                                                                                                                                        |
| Y / Å                | -3.49, -3.39, -3.28, -3.18, -3.07, -2.91,<br>-2.75, -2.59, -2.43, -2.28, -2.12, -1.96,<br>-1.80, -1.64, -1.48, -1.32, -1.16, -1.01,<br>-0.85, -0.69, -0.53, -0.37, -0.21, -0.05,<br>0.11, 0.26, 0.42, 0.58, 0.74, 0.90, 1.06,<br>1.22, 1.38, 1.53 + specific points |
| Z / Å                | 18.52, 13.23, 7.94, 6.35, 5.29, 5.03, 4.76,<br>4.50, 4.23, 3.97, 3.70, 3.44, 3.18, 2.91,<br>2.65, 2.38, 2.28, 2.17, 2.06, 1.96, 1.85,<br>1.75, 1.64, 1.53, 1.32 + specific points                                                                                   |

### S1.3 Cluster size convergence

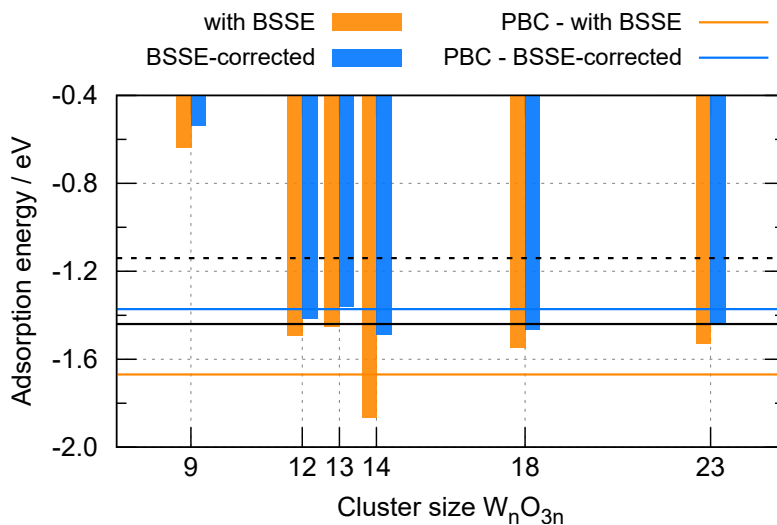

Figure S2: Convergence of the cluster size with respect to periodic boundary calculations (PBC) including the BSSE using PBE0.

### S1.4 Different structures of the neural networks

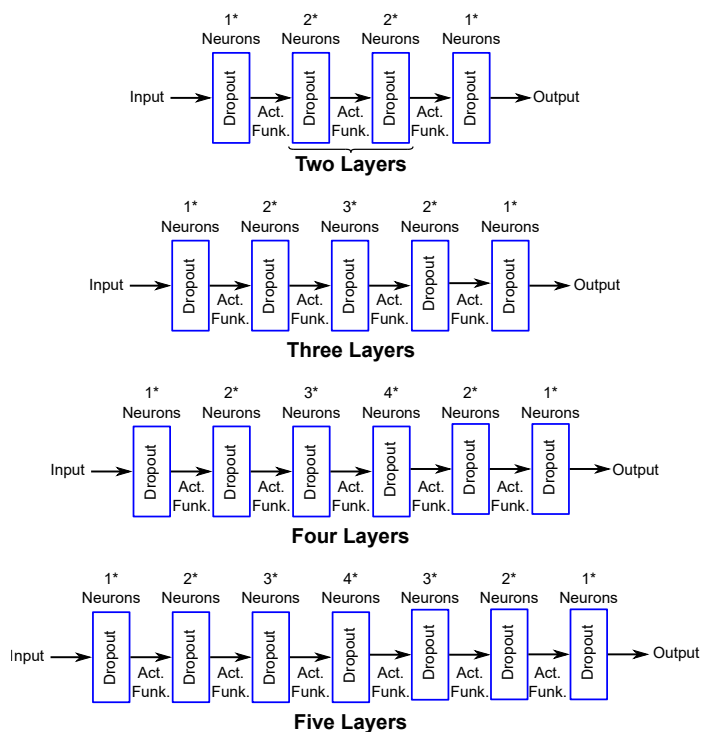

Figure S3: Structure of the neural networks in terms of layers and neurons.

## S1.5 Activation functions

Table S2: Different activation functions  $\sigma$  including value range.

| Name       | Activation Function                                                                                                                  | Value Range                       |
|------------|--------------------------------------------------------------------------------------------------------------------------------------|-----------------------------------|
| ReLU       | $\sigma(x) = \begin{cases} x & \text{für } x \geq 0 \\ 0 & \text{sonst} \end{cases}$                                                 | $[0, \infty]$                     |
| Leaky ReLU | $\sigma(x) = \begin{cases} x & \text{für } x > 0 \\ 0.01 \cdot x & \text{sonst} \end{cases}$                                         | $[-\infty, \infty]$               |
| Rand. ReLU | $\sigma(x) = \begin{cases} x & \text{für } x > 0 \\ a \cdot x & \text{sonst} \end{cases}$                                            | $[-\infty, \infty]$               |
| SELU       | $\sigma(x) = \lambda \begin{cases} x & \text{für } x > 0 \\ \alpha \cdot \exp(x) - \alpha & \text{sonst} \end{cases}$                | $[-\alpha \cdot \lambda, \infty]$ |
| CELU       | $\sigma(x) = \begin{cases} x & \text{für } x \geq 0 \\ a \left( \exp\left(\frac{x}{a}\right) - 1 \right) & \text{sonst} \end{cases}$ | $[a, \infty]$                     |
| tanh       | $\sigma(x) = \frac{\exp(x) - \exp(-x)}{\exp(x) + \exp(-x)}$                                                                          | $[-1, 1]$                         |
| Sigmoid    | $\sigma(x) = \frac{1}{1 + \exp(-x)}$                                                                                                 | $[0, 1]$                          |
| Tanhshrink | $\sigma(x) = x - \frac{\exp(x) - \exp(-x)}{\exp(x) + \exp(-x)}$                                                                      | $[-\infty, \infty]$               |

Randomized ReLU:  $a$  is a random number between  $\frac{1}{8}$  and  $\frac{1}{3}$   
 SELU:  $\alpha = 1.6732632423543772848170429916717$   
 $\lambda = 1.0507009873554804934193349852946$   
 CELU:  $a = 1$

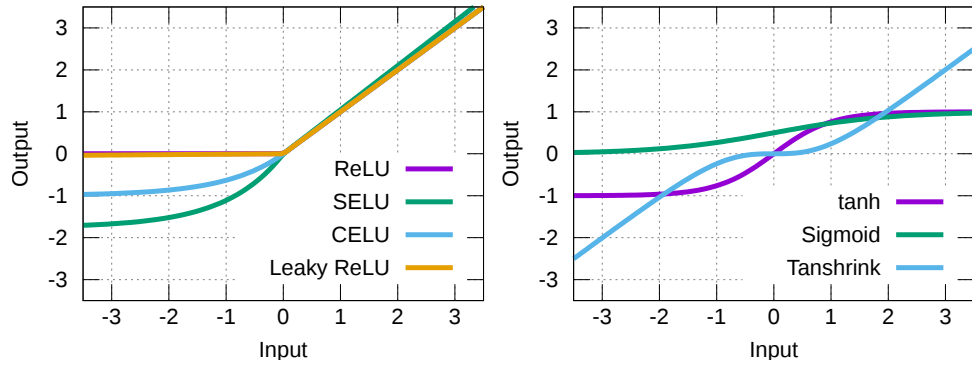

Figure S4: Visualisation of the *linear unit* activation functions (left) and classical functions (right).

## S1.6 (2+2)-Genetic Algorithm Pseudocode

---

### Algorithm 1 (2+2)-Genetic Algorithm

---

```

procedure (2+2)-GA
  Initialize two random parents
  Calculate fitness of both parents
  for  $i = 0, 99$  do
    Crossover
    Mutation
    Neural Network Fits
    parents  $\leftarrow$  best two solutions
  end for
  return best solution
end procedure

```

$\triangleright$  100 iterations  $\rightarrow$  200 nets  $\rightarrow$  1/5 of all data  
 $\triangleright$  Recombination of bitstrings  
 $\triangleright$  Using Rechenberg 1/5 rule

---

## S1.7 Wave packet dynamics and photodesorption

We have used the split propagator throughout. Formulated in real time the following expression results:

$$\exp(-i\hat{H}\Delta t) \approx \exp\left(-i\frac{\hat{T}}{2}\Delta t\right) \cdot \exp(-i\hat{V}\Delta t) \cdot \exp\left(-i\frac{\hat{T}}{2}\Delta t\right) \quad (\text{S.1})$$

In imaginary time we substitute the time  $t$  with the imaginary time  $\tau = i \cdot t$  resulting in

$$\exp(-\hat{H}\tau) \approx \exp\left(-\frac{\hat{T}}{2}\tau\right) \cdot \exp(-\hat{V}\tau) \cdot \exp\left(-\frac{\hat{T}}{2}\tau\right) \quad (\text{S.2})$$

Due to the exponent term, all summands are now striving towards 0 if the propagation time is sufficiently long. Since the ground state wave function is energetically lowest, this state remains longest. The simulation of the photodesorption process is depicted in figure S5 with different residence lifetimes  $\tau_n$ .

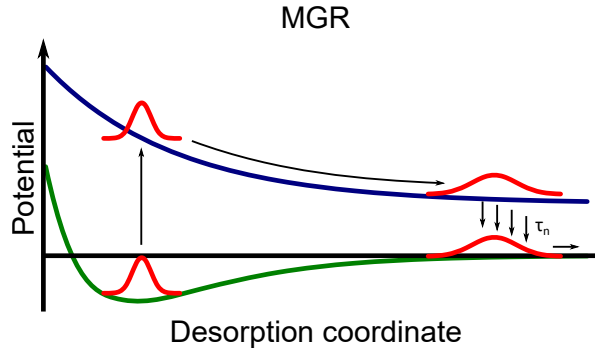

Figure S5: Menzel-Gomer-Redhead (MGR) mechanism of the photodesorption process [1,2].

The wave packet is generated on the ground state (green potential) by imaginary time propagation and then vertical transferred to the CT state (blue potential). The wave packet is then propagated on the CT state in real time. We performed the *jumping wave packet method* to relax the wave packet back on the ground state after selected time steps and propagated it there until convergence of the expectation values. It has been shown that this procedure is equivalent to a solution of the Liouville-Neumann equation for open quantum systems [3]. Although this jumping wave packet scenario is a simple way to treat electronic relaxation, it has been shown that this stochastic approach gives almost identical results to the Surrogate Hamiltonian method which treats the whole photodesorption scenario, including electronic relaxation, in a much more sophisticated model from first principles [4].

[1] D. Menzel, R. Gomer, *J. Chem. Phys.* **1964**, 41, 3311.

[2] P. A. Redhead, *Can. J. Phys.* **1964**, 42, 886.

[3] P. Saalfrank, *Chem. Rev.* **2006**, 106, 4116-4159.

[4] S. Dittrich, H.-J. Freund, *et al.*, *J. Chem. Phys.*, **2006**, 124, 024702.

## S1.8 Genetic algorithm

Table S3: Hyperparameter combination considered by genetic algorithm for ground state PES fitting. The optimized combination is highlighted in bold.

| Layers | Neurons | Activation Func. | Loss Func. | Dropout | Performance Training | Performance Test |
|--------|---------|------------------|------------|---------|----------------------|------------------|
| 4      | 32      | CELU             | MAE        | 0.00    | 0.017873940          | 0.016732890      |
| 5      | 32      | CELU             | LogCosh    | 0.01    | 0.096470690          | 0.099655200      |
| 4      | 128     | Tanhshrink       | MSE        | 0.00    | 1.774340880          | 1.718528190      |
| 2      | 128     | Sigmoid          | LogCosh    | 0.00    | 0.020286140          | 0.023106120      |
| 4      | 128     | Sigmoid          | MSE        | 0.00    | 0.020844190          | 0.045571210      |
| 4      | 32      | Sigmoid          | LogCosh    | 0.00    | 0.010792230          | 0.016261950      |
| 4      | 32      | RReLU            | LogCosh    | 0.00    | 9.999999998          | 9.999999998      |
| 4      | 128     | Sigmoid          | MAE        | 0.00    | 1.704198220          | 1.554776350      |
| 4      | 64      | Sigmoid          | LogCosh    | 0.00    | 1.598240250          | 1.683007440      |
| 4      | 128     | Sigmoid          | MSE        | 0.01    | 1.755993410          | 1.805787220      |
| 2      | 128     | SELU             | LogCosh    | 0.00    | 0.013468970          | 0.037764470      |
| 4      | 32      | Sigmoid          | LogCosh    | 0.05    | 1.682656450          | 1.697179520      |
| 4      | 256     | Tanh             | LogCosh    | 0.00    | 0.019406830          | 0.019747230      |
| 4      | 128     | Sigmoid          | MSE        | 0.05    | 1.796478800          | 1.623941730      |
| 4      | 32      | Sigmoid          | MSE        | 0.00    | 0.022230240          | 0.021280700      |
| 5      | 32      | Tanh             | LogCosh    | 0.01    | 0.269033980          | 0.228581830      |
| 4      | 128     | Sigmoid          | MSE+MAE    | 0.00    | 1.667948940          | 1.716534210      |
| 4      | 64      | Sigmoid          | MSE        | 0.00    | 0.007566390          | 0.014550040      |
| 4      | 128     | Sigmoid          | LogCosh    | 0.00    | 0.020616400          | 0.026438220      |
| 4      | 32      | Tanhshrink       | MSE        | 0.00    | 1.774589420          | 1.710616890      |
| 5      | 32      | Sigmoid          | MSE        | 0.00    | 1.758427290          | 1.786320520      |
| 4      | 256     | Tanhshrink       | MSE        | 0.00    | 1.750049950          | 1.835602380      |
| 4      | 128     | Sigmoid          | LogCosh    | 0.01    | 1.669700450          | 1.769719780      |
| 4      | 32      | Sigmoid          | MSE        | 0.05    | 1.776334110          | 1.724681240      |
| 4      | 64      | Tanhshrink       | MAE        | 0.00    | 1.694207180          | 1.617423710      |
| 2      | 32      | Sigmoid          | LogCosh    | 0.00    | 0.024996180          | 0.027107180      |
| 4      | 128     | Tanh             | MSE        | 0.00    | 0.024568360          | 0.037682790      |
| 4      | 32      | Tanhshrink       | LogCosh    | 0.00    | 1.687917670          | 1.672836210      |
| 4      | 256     | Sigmoid          | LogCosh    | 0.00    | 0.004258620          | 0.035270360      |
| 4      | 32      | Sigmoid          | MSE        | 0.01    | 1.747923730          | 1.836292960      |
| 5      | 128     | Tanhshrink       | MSE+MAE    | 0.00    | 1.666618040          | 1.723708080      |
| 2      | 128     | Sigmoid          | MSE        | 0.00    | 0.017766990          | 0.031180350      |
| 4      | 128     | CELU             | MSE        | 0.01    | 0.022657550          | 0.032512820      |
| 4      | 32      | RReLU            | LogCosh    | 0.01    | 0.494666540          | 0.509735460      |
| 5      | 128     | Sigmoid          | LogCosh    | 0.00    | 1.681096500          | 1.703693440      |
| 4      | 32      | Tanhshrink       | MSE        | 0.01    | 1.785443780          | 1.681737100      |
| 4      | 128     | Tanhshrink       | LogCosh    | 0.00    | 1.670188290          | 1.773468280      |
| 5      | 32      | Sigmoid          | LogCosh    | 0.00    | 1.672052480          | 1.752041210      |

*Continued on next page*

Table S3 – Continued from previous page

| Layers | Neurons | Activation<br>Func. | Loss<br>Func. | Dropout | Performance<br>Training | Performance<br>Test |
|--------|---------|---------------------|---------------|---------|-------------------------|---------------------|
| 4      | 128     | Tanhshrink          | MSE           | 0.05    | 1.753234940             | 1.823089580         |
| 4      | 64      | RReLU               | LogCosh       | 0.00    | 0.237800870             | 0.256689120         |
| 5      | 128     | Tanh                | LogCosh       | 0.00    | 0.020699000             | 0.020230560         |
| 5      | 32      | Tanhshrink          | LogCosh       | 0.10    | 1.673412460             | 1.747944320         |
| 5      | 128     | Sigmoid             | LogCosh       | 0.01    | 1.683507800             | 1.693108780         |
| 4      | 32      | Sigmoid             | MAE           | 0.05    | 1.662528040             | 1.794000920         |
| 2      | 128     | Sigmoid             | MSE           | 0.01    | 0.028124220             | 0.045912000         |
| 2      | 32      | RReLU               | LogCosh       | 0.00    | 0.257997960             | 0.283363720         |
| 4      | 128     | Tanh                | LogCosh       | 0.00    | 0.021919690             | 0.026405260         |
| 4      | 32      | Sigmoid             | MAE           | 0.00    | 1.684486190             | 1.668871830         |
| 4      | 32      | Sigmoid             | LogCosh       | 0.01    | 1.690320040             | 1.660011370         |
| 4      | 128     | RReLU               | MSE           | 0.00    | 0.016395270             | 0.021749480         |
| 4      | 128     | Tanhshrink          | MSE+MAE       | 0.00    | 1.679926000             | 1.648536250         |
| 4      | 32      | SELU                | MSE           | 0.00    | 0.013967730             | 0.026142340         |
| 4      | 256     | Sigmoid             | MSE+MAE       | 0.00    | 0.005178120             | 0.017391240         |
| 2      | 32      | Sigmoid             | MSE           | 0.00    | 0.008365130             | 0.017093470         |
| 4      | 32      | CELU                | MSE           | 0.05    | 0.070272270             | 0.071368430         |
| 5      | 128     | Sigmoid             | MSE           | 0.00    | 1.752396790             | 1.837723370         |
| 5      | 128     | Sigmoid             | MSE+MAE       | 0.00    | 1.659298110             | 1.763318300         |
| 5      | 32      | SELU                | LogCosh       | 0.00    | 0.018800570             | 0.039248680         |
| 2      | 128     | Tanh                | LogCosh       | 0.00    | 0.006699160             | 0.021780620         |
| 5      | 32      | Tanhshrink          | MSE+MAE       | 0.00    | 1.688064200             | 1.601536430         |
| 5      | 32      | RReLU               | LogCosh       | 0.00    | 0.107862040             | 0.110441570         |
| 4      | 128     | Tanhshrink          | MSE           | 0.10    | 1.788527160             | 1.640843720         |
| 4      | 32      | Tanh                | LogCosh       | 0.10    | 0.144022350             | 0.150061070         |
| 4      | 32      | Tanh                | MSE           | 0.00    | 0.019103250             | 0.019943890         |
| 2      | 128     | Tanhshrink          | LogCosh       | 0.00    | 1.677701100             | 1.726911710         |
| 2      | 32      | Sigmoid             | MAE           | 0.05    | 0.366715560             | 0.387625260         |
| 4      | 128     | RReLU               | LogCosh       | 0.00    | 0.049110640             | 0.066576830         |
| 4      | 32      | Sigmoid             | MSE+MAE       | 0.00    | 1.660826160             | 1.755262820         |
| 4      | 128     | Tanh                | MSE           | 0.01    | 0.264646300             | 0.278177660         |
| 4      | 128     | Sigmoid             | LogCosh       | 0.05    | 1.692942920             | 1.639464320         |
| 4      | 32      | SELU                | LogCosh       | 0.00    | 0.007285040             | 0.041482030         |
| 5      | 128     | Sigmoid             | MAE           | 0.00    | 1.686018330             | 1.660201340         |
| 4      | 256     | Sigmoid             | MAE           | 0.00    | 1.685640970             | 1.663461610         |
| 4      | 32      | CELU                | LogCosh       | 0.00    | 0.007812140             | 0.018955230         |
| 2      | 256     | Sigmoid             | LogCosh       | 0.00    | 0.025238420             | 0.028205440         |
| 4      | 32      | Tanh                | LogCosh       | 0.00    | 0.018105930             | 0.020193300         |
| 4      | 128     | RReLU               | MSE+MAE       | 0.00    | 0.016189540             | 0.027736900         |
| 3      | 32      | Sigmoid             | MSE           | 0.00    | 0.015383960             | 0.030019270         |
| 2      | 128     | Sigmoid             | MSE           | 0.05    | 0.053454280             | 0.072648770         |

Continued on next page

Table S3 – Continued from previous page

| Layers   | Neurons    | Activation<br>Func. | Loss<br>Func. | Dropout     | Performance<br>Training | Performance<br>Test |
|----------|------------|---------------------|---------------|-------------|-------------------------|---------------------|
| 4        | 128        | Tanhshrink          | MSE           | 0.01        | 1.736200590             | 1.903448130         |
| 5        | 32         | Tanh                | LogCosh       | 0.00        | 0.009786260             | 0.017333240         |
| 4        | 128        | Sigmoid             | MSE           | 0.10        | 1.782420320             | 1.688238430         |
| 3        | 128        | Tanh                | LogCosh       | 0.00        | 0.019681050             | 0.023050570         |
| 4        | 256        | Sigmoid             | MSE           | 0.00        | 0.005654550             | 0.033978340         |
| 5        | 128        | Tanhshrink          | LogCosh       | 0.05        | 1.661089830             | 1.814585080         |
| 4        | 32         | RReLU               | MSE           | 0.00        | 0.030259660             | 0.035595240         |
| 2        | 128        | Sigmoid             | MSE+MAE       | 0.00        | 0.012905400             | 0.038525240         |
| 2        | 32         | Tanh                | MSE           | 0.00        | 0.022240540             | 0.025888510         |
| 5        | 32         | RReLU               | MSE           | 0.00        | 0.023223020             | 0.028626730         |
| 4        | 32         | Tanh                | MAE           | 0.00        | 0.019170070             | 0.018574000         |
| 5        | 128        | Tanh                | MSE           | 0.05        | 0.037658550             | 0.056033530         |
| 4        | 32         | Sigmoid             | MSE+MAE       | 0.01        | 1.684758220             | 1.621099920         |
| 4        | 128        | Tanh                | MSE           | 0.05        | 0.086547990             | 0.095958680         |
| 4        | 64         | Sigmoid             | LogCosh       | 0.01        | 1.680455120             | 1.711761410         |
| 2        | 128        | Sigmoid             | LogCosh       | 0.05        | 0.036619930             | 0.055896600         |
| 4        | 32         | Sigmoid             | MSE           | 0.10        | 1.758294040             | 1.788704330         |
| 4        | 128        | Sigmoid             | LogCosh       | 0.10        | 1.671909690             | 1.756641040         |
| 4        | 32         | RReLU               | MAE           | 0.00        | 0.025616560             | 0.026778840         |
| 4        | 128        | Leaky ReLU          | LogCosh       | 0.01        | 0.162443490             | 0.190865180         |
| 4        | 32         | RReLU               | MSE           | 0.10        | 0.136877990             | 0.125148800         |
| 4        | 128        | Tanhshrink          | LogCosh       | 0.05        | 1.676132840             | 1.737408210         |
| 2        | 32         | RReLU               | MAE           | 0.00        | 0.050526070             | 0.059918050         |
| 5        | 128        | RReLU               | LogCosh       | 0.00        | 0.209022260             | 0.225961200         |
| 5        | 64         | Sigmoid             | MSE           | 0.00        | 1.744113080             | 1.858468680         |
| <b>5</b> | <b>128</b> | <b>Tanh</b>         | <b>MSE</b>    | <b>0.00</b> | <b>0.007452660</b>      | <b>0.013695040</b>  |
| 4        | 32         | Tanhshrink          | MSE+MAE       | 0.00        | 1.679982700             | 1.648201220         |
| 5        | 128        | RReLU               | MSE           | 0.00        | 0.030654930             | 0.037936360         |
| 5        | 32         | Tanhshrink          | LogCosh       | 0.05        | 1.675210090             | 1.737494330         |
| 4        | 64         | Sigmoid             | LogCosh       | 0.05        | 1.670747450             | 1.762110300         |
| 4        | 128        | Leaky ReLU          | MSE           | 0.00        | 0.002791920             | 0.034583760         |
| 4        | 32         | Tanh                | MSE+MAE       | 0.00        | 0.017553300             | 0.023245110         |
| 4        | 128        | Leaky ReLU          | MAE           | 0.00        | 0.014167490             | 0.031017770         |
| 4        | 256        | Tanhshrink          | LogCosh       | 0.00        | 1.679507350             | 1.715805380         |
| 4        | 32         | Leaky ReLU          | MAE           | 0.01        | 0.060354080             | 0.069510600         |
| 4        | 128        | RReLU               | MSE           | 0.01        | 0.027473870             | 0.032042650         |
| 4        | 32         | Tanhshrink          | MAE           | 0.00        | 1.679117940             | 1.704247060         |
| 5        | 256        | RReLU               | LogCosh       | 0.05        | 0.272794180             | 0.272489320         |
| 2        | 64         | Sigmoid             | MSE           | 0.00        | 0.021068600             | 0.018753470         |
| 4        | 128        | Sigmoid             | MSE+MAE       | 0.05        | 1.678837740             | 1.654789830         |

Continued on next page



Table S3 – Continued from previous page

| Layers | Neurons | Activation<br>Func. | Loss<br>Func. | Dropout | Performance<br>Training | Performance<br>Test |
|--------|---------|---------------------|---------------|---------|-------------------------|---------------------|
| 4      | 32      | Tanhshrink          | MAE           | 0.05    | 1.695330370             | 1.606960460         |
| 4      | 128     | Tanhshrink          | LogCosh       | 0.01    | 1.686086240             | 1.672591910         |
| 2      | 32      | Sigmoid             | MSE           | 0.05    | 0.103392430             | 0.113180100         |
| 2      | 128     | Leaky ReLU          | LogCosh       | 0.00    | 0.005257770             | 0.021702810         |
| 3      | 32      | Sigmoid             | MSE           | 0.01    | 0.131314050             | 0.133351980         |
| 2      | 256     | Sigmoid             | MSE           | 0.00    | 0.009428880             | 0.027547100         |
| 4      | 64      | SELU                | MSE           | 0.00    | 0.001528200             | 0.033251770         |
| 2      | 128     | RReLU               | MSE           | 0.00    | 0.024675890             | 0.031007690         |
| 4      | 64      | Sigmoid             | MSE+MAE       | 0.00    | 1.690151890             | 1.589561220         |
| 2      | 256     | RReLU               | MSE           | 0.00    | 0.019421610             | 0.029409320         |
| 4      | 32      | Tanh                | LogCosh       | 0.01    | 0.033777880             | 0.060709350         |
| 4      | 128     | CELU                | LogCosh       | 0.00    | 0.015892170             | 0.027540100         |
| 5      | 32      | Sigmoid             | MSE           | 0.01    | 1.786271450             | 1.667944500         |
| 4      | 128     | RReLU               | LogCosh       | 0.05    | 0.341414990             | 0.330105590         |
| 4      | 32      | RReLU               | LogCosh       | 0.05    | 0.627278630             | 0.603830950         |
| 2      | 32      | Tanhshrink          | LogCosh       | 0.00    | 1.677059400             | 1.730655120         |
| 4      | 128     | Sigmoid             | MAE           | 0.05    | 1.682310020             | 1.682645020         |
| 5      | 128     | Sigmoid             | MSE           | 0.01    | 1.771384550             | 1.724780460         |
| 4      | 256     | Tanh                | LogCosh       | 0.01    | 0.022221440             | 0.030305530         |
| 4      | 128     | Tanhshrink          | MAE           | 0.00    | 1.660332280             | 1.806320300         |
| 4      | 32      | Tanhshrink          | LogCosh       | 0.05    | 1.687550100             | 1.676459700         |
| 3      | 128     | Sigmoid             | LogCosh       | 0.00    | 0.020466930             | 0.025223220         |
| 4      | 32      | CELU                | MSE           | 0.00    | 0.004246830             | 0.029239300         |
| 4      | 256     | Sigmoid             | LogCosh       | 0.01    | 1.693979900             | 1.636313630         |
| 4      | 32      | Leaky ReLU          | MSE           | 0.00    | 0.002614590             | 0.024803230         |
| 5      | 128     | Tanhshrink          | LogCosh       | 0.00    | 1.687985480             | 1.666041710         |
| 5      | 32      | Tanhshrink          | MSE           | 0.00    | 1.759080650             | 1.796721500         |
| 4      | 256     | RReLU               | MSE           | 0.00    | 0.016097610             | 0.027471210         |
| 4      | 64      | Tanhshrink          | LogCosh       | 0.00    | 1.694711910             | 1.627393400         |
| 3      | 32      | Sigmoid             | LogCosh       | 0.00    | 0.013167950             | 0.036659990         |
| 4      | 128     | RReLU               | MSE           | 0.05    | 0.050613640             | 0.070971760         |
| 2      | 128     | Tanh                | MSE           | 0.00    | 0.019691210             | 0.024253740         |
| 4      | 64      | Tanh                | LogCosh       | 0.00    | 0.008948350             | 0.015898560         |
| 4      | 256     | Sigmoid             | LogCosh       | 0.05    | 1.681227820             | 1.711136660         |
| 2      | 32      | Sigmoid             | MSE           | 0.01    | 1.767986030             | 1.761272500         |
| 4      | 32      | RReLU               | MSE+MAE       | 0.00    | 0.024035800             | 0.031427270         |
| 4      | 256     | Sigmoid             | MSE           | 0.01    | 1.737500060             | 1.877924500         |
| 4      | 128     | Tanh                | MAE           | 0.00    | 0.015663010             | 0.026333000         |
| 2      | 32      | Sigmoid             | MSE+MAE       | 0.00    | 0.017442480             | 0.017413120         |
| 4      | 128     | Tanh                | MSE+MAE       | 0.00    | 0.002878690             | 0.021521460         |

Continued on next page

Table S3 – Continued from previous page

| Layers | Neurons | Activation<br>Func. | Loss<br>Func. | Dropout | Performance<br>Training | Performance<br>Test |
|--------|---------|---------------------|---------------|---------|-------------------------|---------------------|
| 5      | 32      | Tanh                | MSE           | 0.00    | 0.010018950             | 0.038573680         |
| 4      | 128     | SELU                | LogCosh       | 0.00    | 0.007916320             | 0.043688320         |
| 4      | 32      | RReLU               | MSE           | 0.05    | 0.111705740             | 0.114219410         |
| 5      | 32      | Sigmoid             | LogCosh       | 0.05    | 1.673497250             | 1.746972430         |
| 4      | 256     | Tanh                | MSE           | 0.00    | 0.015524150             | 0.021075360         |
| 4      | 128     | RReLU               | MAE           | 0.00    | 0.020133520             | 0.024820780         |
| 4      | 32      | Tanh                | LogCosh       | 0.05    | 0.101630160             | 0.116220050         |
| 2      | 128     | RReLU               | LogCosh       | 0.00    | 0.025853060             | 0.042362490         |
| 5      | 32      | Sigmoid             | MSE           | 0.05    | 1.771017460             | 1.739657950         |
| 4      | 128     | Tanhshrink          | MAE           | 0.01    | 1.687296150             | 1.654548620         |
| 5      | 128     | Sigmoid             | LogCosh       | 0.05    | 1.665028480             | 1.790090530         |
| 2      | 128     | Tanhshrink          | MSE           | 0.00    | 1.771969610             | 1.720501140         |
| 5      | 32      | Tanhshrink          | LogCosh       | 0.00    | 1.673650190             | 1.746709510         |
| 4      | 128     | SELU                | MSE           | 0.00    | 1.636436140             | 1.701639870         |
| 5      | 32      | CELU                | LogCosh       | 0.00    | 0.017048200             | 0.025277230         |
| 5      | 256     | Sigmoid             | LogCosh       | 0.00    | 1.688022920             | 1.673057430         |
| 4      | 64      | RReLU               | MSE           | 0.00    | 0.020421730             | 0.034689530         |
| 4      | 128     | RReLU               | LogCosh       | 0.01    | 0.774253750             | 0.816961190         |
| 4      | 64      | Tanhshrink          | MSE           | 0.00    | 1.760888650             | 1.791585530         |
| 4      | 256     | Sigmoid             | MAE           | 0.05    | 1.687815010             | 1.651619380         |
| 4      | 32      | Tanh                | MSE           | 0.05    | 0.105413990             | 0.111994450         |
| 4      | 256     | Sigmoid             | MSE           | 0.05    | 1.777869890             | 1.697559190         |
| 2      | 32      | RReLU               | MSE           | 0.00    | 0.043314580             | 0.057923910         |
| 4      | 32      | Tanh                | MSE+MAE       | 0.01    | 0.045857730             | 0.051231780         |
| 2      | 128     | CELU                | MSE           | 0.00    | 0.018974590             | 0.021096240         |
| 4      | 128     | CELU                | MSE           | 0.00    | 0.006337330             | 0.027822300         |
| 2      | 32      | Tanh                | LogCosh       | 0.00    | 0.025419660             | 0.027639920         |
| 2      | 128     | Leaky ReLU          | MSE           | 0.00    | 0.001057420             | 0.025369480         |
| 4      | 32      | Tanhshrink          | LogCosh       | 0.01    | 1.676656990             | 1.729960990         |
| 4      | 128     | Sigmoid             | MSE+MAE       | 0.01    | 1.682893570             | 1.630699370         |
| 4      | 64      | Sigmoid             | MSE           | 0.01    | 1.766514970             | 1.761998190         |
| 4      | 32      | Sigmoid             | LogCosh       | 0.10    | 1.680506660             | 1.707156690         |
| 3      | 128     | Sigmoid             | MSE           | 0.00    | 0.022977840             | 0.039231650         |
| 4      | 128     | Sigmoid             | MAE           | 0.01    | 1.687873330             | 1.652858090         |
| 2      | 32      | Sigmoid             | LogCosh       | 0.05    | 0.115389750             | 0.123467130         |
| 5      | 128     | Tanhshrink          | MAE           | 0.00    | 1.652195070             | 1.850433540         |
| 4      | 32      | Tanh                | MSE           | 0.01    | 0.100983570             | 0.111980900         |
| 3      | 128     | Sigmoid             | LogCosh       | 0.05    | 0.030027470             | 0.048608470         |
| 2      | 32      | Sigmoid             | MAE           | 0.00    | 0.019863380             | 0.020371050         |
| 2      | 128     | Sigmoid             | LogCosh       | 0.01    | 0.030873010             | 0.037223060         |
| 2      | 128     | Sigmoid             | MAE           | 0.00    | 0.014156520             | 0.045119440         |

Table S4: Hyperparameter combination considered by genetic algorithm for charge-transfer state PES fitting.

| Layers | Neurons | Activation Func. | Loss Func. | Dropout | Performance Training | Performance Test |
|--------|---------|------------------|------------|---------|----------------------|------------------|
| 5      | 32      | Sigmoid          | MSE        | 0.10    | 2.800117890          | 2.833280430      |
| 4      | 256     | RReLU            | LogCosh    | 0.01    | 0.298483470          | 0.305868910      |
| 3      | 128     | Tanhshrink       | MAE        | 0.00    | 2.750994850          | 2.806069530      |
| 5      | 64      | SELU             | LogCosh    | 0.00    | 0.027651570          | 0.074822650      |
| 4      | 128     | Leaky ReLU       | MAE        | 0.00    | 0.030110410          | 0.045501800      |
| 5      | 256     | Tanh             | MSE+MAE    | 0.00    | 0.010890700          | 0.061954710      |
| 5      | 128     | Sigmoid          | LogCosh    | 0.00    | 0.038002800          | 0.045533820      |
| 5      | 256     | ReLU             | MAE        | 0.00    | 0.024422570          | 0.062487240      |
| 3      | 32      | Sigmoid          | LogCosh    | 0.05    | 0.809461090          | 0.808351100      |
| 5      | 256     | Tanhshrink       | MSE        | 0.00    | 2.812556570          | 2.782722510      |
| 5      | 128     | Leaky ReLU       | MAE        | 0.00    | 0.032262540          | 0.042871590      |
| 5      | 256     | Tanh             | LogCosh    | 0.00    | 0.036003860          | 0.075295040      |
| 3      | 256     | ReLU             | MAE        | 0.01    | 0.084392740          | 0.106259190      |
| 5      | 256     | RReLU            | LogCosh    | 0.01    | 1.561708690          | 1.539398000      |
| 5      | 128     | SELU             | MAE        | 0.01    | 0.042209300          | 0.085952170      |
| 5      | 64      | Sigmoid          | LogCosh    | 0.00    | 0.021603610          | 0.046658570      |
| 4      | 256     | CELU             | MSE        | 0.01    | 0.058107640          | 0.062303920      |
| 3      | 256     | Sigmoid          | LogCosh    | 0.00    | 0.004440480          | 0.034754120      |
| 5      | 128     | Sigmoid          | MSE+MAE    | 0.00    | 2.729687500          | 2.784535070      |
| 5      | 256     | Leaky ReLU       | MSE        | 0.00    | 0.023432750          | 0.065689490      |
| 5      | 128     | Sigmoid          | LogCosh    | 0.01    | 1.357632670          | 1.381425740      |
| 5      | 64      | ReLU             | MAE        | 0.00    | 0.037445190          | 0.048953510      |
| 5      | 128     | Tanhshrink       | MSE+MAE    | 0.00    | 9.508642790          | 9.486309410      |
| 5      | 256     | SELU             | LogCosh    | 0.00    | 0.032275210          | 0.059580380      |
| 5      | 64      | SELU             | MAE        | 0.00    | 0.041041300          | 0.073959620      |
| 5      | 128     | Tanh             | LogCosh    | 0.10    | 0.124677610          | 0.158724780      |
| 3      | 256     | ReLU             | MAE        | 0.00    | 0.029518630          | 0.046809410      |
| 4      | 128     | Sigmoid          | LogCosh    | 0.00    | 0.038203080          | 0.057428520      |
| 3      | 128     | ReLU             | MSE        | 0.01    | 0.079450620          | 0.091481250      |
| 3      | 256     | Tanh             | LogCosh    | 0.00    | 1.264314160          | 1.361305750      |
| 5      | 256     | ReLU             | MAE        | 0.05    | 0.116453370          | 0.149400070      |
| 5      | 256     | Sigmoid          | LogCosh    | 0.00    | 0.012975110          | 0.033025820      |
| 5      | 128     | Sigmoid          | MAE        | 0.00    | 2.799907810          | 2.496902420      |
| 5      | 256     | ReLU             | LogCosh    | 0.00    | 0.030003790          | 0.053801100      |
| 5      | 128     | Tanhshrink       | MAE        | 0.00    | 2.737570830          | 2.876153950      |
| 5      | 256     | SELU             | MSE+MAE    | 0.01    | 0.052005270          | 0.077625040      |
| 5      | 256     | Leaky ReLU       | MAE        | 0.00    | 0.032388090          | 0.064945070      |
| 5      | 128     | Tanhshrink       | MSE        | 0.00    | 2.802657700          | 2.829614910      |

*Continued on next page*

Table S4 – Continued from previous page

| Layers   | Neurons    | Activation<br>Func. | Loss<br>Func. | Dropout     | Performance<br>Training | Performance<br>Test |
|----------|------------|---------------------|---------------|-------------|-------------------------|---------------------|
| 4        | 256        | ReLU                | MAE           | 0.05        | 0.118878450             | 0.128731640         |
| 5        | 128        | Sigmoid             | MSE           | 0.05        | 0.087362630             | 0.120536870         |
| 5        | 128        | Sigmoid             | MSE+MAE       | 0.05        | 2.724721830             | 2.812461740         |
| 5        | 256        | CELU                | MAE           | 0.05        | 0.071096110             | 0.110773240         |
| 5        | 128        | Sigmoid             | MAE           | 0.01        | 2.743404970             | 2.837212640         |
| 5        | 256        | SELU                | MSE+MAE       | 0.00        | 0.030756500             | 0.054985130         |
| 5        | 128        | Tanh                | MSE+MAE       | 0.00        | 0.010046250             | 0.038485590         |
| 3        | 256        | CELU                | MSE           | 0.00        | 0.033379280             | 0.055676430         |
| 5        | 32         | Sigmoid             | MAE           | 0.00        | 2.777347180             | 2.639207550         |
| 4        | 128        | SELU                | MAE           | 0.00        | 0.029635830             | 0.075880030         |
| 5        | 256        | ReLU                | MSE           | 0.00        | 0.027993330             | 0.056534860         |
| 5        | 128        | CELU                | LogCosh       | 0.00        | 0.016275520             | 0.079819400         |
| 3        | 128        | Tanh                | MAE           | 0.05        | 0.149381430             | 0.188185460         |
| 5        | 64         | Tanh                | LogCosh       | 0.00        | 9.411213600             | 9.461619860         |
| 5        | 128        | Tanh                | LogCosh       | 0.00        | 0.031725060             | 0.035359110         |
| 5        | 256        | SELU                | MAE           | 0.01        | 0.049140570             | 0.087706800         |
| 5        | 256        | ReLU                | MSE+MAE       | 0.00        | 0.019288780             | 0.075782310         |
| 5        | 32         | RReLU               | LogCosh       | 0.00        | 0.749646370             | 0.710262370         |
| 5        | 128        | Tanhshrink          | LogCosh       | 0.00        | 9.999999998             | 9.999999998         |
| 5        | 256        | ReLU                | MAE           | 0.10        | 0.180228290             | 0.189577870         |
| 5        | 32         | Sigmoid             | LogCosh       | 0.00        | 0.027421340             | 0.059737240         |
| 4        | 256        | Leaky ReLU          | MAE           | 0.01        | 0.051000400             | 0.062476650         |
| 4        | 256        | SELU                | MAE           | 0.00        | 0.027966680             | 0.057656840         |
| 2        | 128        | Sigmoid             | LogCosh       | 0.00        | 9.999999998             | 9.999999998         |
| 4        | 128        | Tanhshrink          | MAE           | 0.00        | 2.750359970             | 2.799332130         |
| 4        | 256        | SELU                | LogCosh       | 0.00        | 0.027851020             | 0.061492360         |
| 5        | 64         | RReLU               | MAE           | 0.00        | 0.037715880             | 0.093066420         |
| <b>5</b> | <b>128</b> | <b>Sigmoid</b>      | <b>MSE</b>    | <b>0.00</b> | <b>0.003020520</b>      | <b>0.023515760</b>  |
| 5        | 128        | CELU                | MAE           | 0.00        | 0.032750630             | 0.057023490         |
| 5        | 256        | Tanhshrink          | LogCosh       | 0.00        | 2.715118160             | 2.903244150         |
| 5        | 256        | CELU                | MAE           | 0.00        | 0.035197000             | 0.036783460         |
| 5        | 32         | ReLU                | LogCosh       | 0.00        | 0.016311470             | 0.056226740         |
| 5        | 128        | ReLU                | MAE           | 0.00        | 0.028461660             | 0.050470450         |
| 4        | 256        | Sigmoid             | MSE           | 0.00        | 0.012368950             | 0.045999450         |
| 5        | 64         | ReLU                | MAE           | 0.01        | 0.085036040             | 0.108040410         |
| 3        | 128        | Sigmoid             | LogCosh       | 0.00        | 0.035524330             | 0.048147080         |
| 5        | 128        | Leaky ReLU          | MAE           | 0.05        | 0.152515850             | 0.171880750         |
| 2        | 256        | ReLU                | LogCosh       | 0.00        | 0.027761830             | 0.048314820         |
| 5        | 128        | RReLU               | MAE           | 0.01        | 0.058871470             | 0.102580750         |
| 5        | 256        | CELU                | LogCosh       | 0.00        | 0.039133650             | 0.064054750         |
| 5        | 256        | ReLU                | MAE           | 0.01        | 0.058166340             | 0.069183830         |

Continued on next page

Table S4 – Continued from previous page

| Layers | Neurons | Activation<br>Func. | Loss<br>Func. | Dropout | Performance<br>Training | Performance<br>Test |
|--------|---------|---------------------|---------------|---------|-------------------------|---------------------|
| 4      | 128     | Sigmoid             | MSE+MAE       | 0.00    | 0.023730000             | 0.045198590         |
| 5      | 128     | Sigmoid             | LogCosh       | 0.05    | 1.301203530             | 1.249895500         |
| 5      | 128     | ReLU                | MSE+MAE       | 0.01    | 0.057478200             | 0.073299000         |
| 4      | 32      | Tanhshrink          | MSE+MAE       | 0.00    | 2.742995820             | 2.709249340         |
| 5      | 256     | ReLU                | MSE           | 0.05    | 0.116400780             | 0.124122120         |
| 5      | 128     | SELU                | MAE           | 0.00    | 0.030746500             | 0.074738750         |
| 3      | 64      | Sigmoid             | LogCosh       | 0.00    | 0.020373380             | 0.045923580         |
| 5      | 256     | ReLU                | MSE+MAE       | 0.05    | 0.101661290             | 0.119989750         |
| 3      | 128     | Tanh                | LogCosh       | 0.00    | 0.044501550             | 0.059351810         |
| 4      | 128     | ReLU                | MSE+MAE       | 0.01    | 0.049824090             | 0.099925220         |
| 2      | 128     | Sigmoid             | LogCosh       | 0.05    | 0.067466030             | 0.117317150         |
| 3      | 128     | Leaky ReLU          | MAE           | 0.00    | 0.028185230             | 0.056636470         |
| 5      | 256     | CELU                | MSE+MAE       | 0.00    | 0.030702600             | 0.056063350         |
| 4      | 256     | Sigmoid             | LogCosh       | 0.05    | 0.068316250             | 0.111489350         |
| 5      | 256     | SELU                | MAE           | 0.00    | 0.040723950             | 0.056615400         |
| 5      | 128     | ReLU                | MAE           | 0.01    | 0.061924680             | 0.078998430         |
| 5      | 256     | Sigmoid             | MSE           | 0.00    | 0.135106940             | 0.273388920         |
| 4      | 256     | Sigmoid             | MSE+MAE       | 0.00    | 0.005751780             | 0.026277870         |
| 5      | 64      | ReLU                | MSE           | 0.00    | 0.030702310             | 0.076643920         |
| 5      | 128     | Tanhshrink          | MAE           | 0.05    | 2.750665850             | 2.827409390         |
| 5      | 256     | SELU                | MSE           | 0.05    | 0.280687190             | 0.273095780         |
| 2      | 128     | Sigmoid             | LogCosh       | 0.01    | 9.999999999             | 9.999999999         |
| 4      | 256     | Leaky ReLU          | MAE           | 0.00    | 0.028952410             | 0.050747500         |
| 5      | 128     | RReLU               | LogCosh       | 0.00    | 0.050609220             | 0.078246050         |
| 5      | 256     | ReLU                | MSE           | 0.01    | 0.044989890             | 0.069609230         |
| 3      | 128     | ReLU                | MAE           | 0.01    | 0.067439040             | 0.078800290         |
| 5      | 256     | Sigmoid             | LogCosh       | 0.01    | 9.999999999             | 9.999999999         |
| 5      | 256     | Tanhshrink          | MAE           | 0.00    | 2.757349740             | 2.762861930         |
| 4      | 128     | Sigmoid             | MSE           | 0.00    | 0.030854010             | 0.071289500         |
| 5      | 128     | Leaky ReLU          | MSE           | 0.00    | 0.001828990             | 0.068159130         |
| 5      | 256     | Sigmoid             | MSE+MAE       | 0.00    | 0.010103620             | 0.036983020         |
| 5      | 256     | ReLU                | MSE+MAE       | 0.01    | 0.048510050             | 0.056458000         |
| 5      | 128     | RReLU               | MSE           | 0.00    | 0.039081270             | 0.050144280         |
| 5      | 128     | CELU                | MSE           | 0.05    | 0.086102810             | 0.120318060         |
| 5      | 256     | SELU                | MSE           | 0.00    | 0.032973210             | 0.063206490         |
| 3      | 128     | Tanhshrink          | LogCosh       | 0.00    | 9.999999999             | 9.999999999         |
| 5      | 256     | CELU                | MAE           | 0.01    | 0.045101840             | 0.079573950         |
| 5      | 256     | Leaky ReLU          | MAE           | 0.01    | 0.052348200             | 0.050300210         |
| 3      | 128     | Sigmoid             | MSE+MAE       | 0.00    | 0.021113300             | 0.039422370         |
| 4      | 128     | Tanh                | MSE+MAE       | 0.00    | 0.009787550             | 0.054194300         |

Continued on next page

Table S4 – Continued from previous page

| Layers | Neurons | Activation<br>Func. | Loss<br>Func. | Dropout | Performance<br>Training | Performance<br>Test |
|--------|---------|---------------------|---------------|---------|-------------------------|---------------------|
| 5      | 128     | ReLU                | MSE           | 0.00    | 0.032394820             | 0.060825720         |
| 5      | 32      | ReLU                | MAE           | 0.00    | 0.035884530             | 0.047156700         |
| 4      | 256     | Sigmoid             | LogCosh       | 0.00    | 0.067027860             | 0.071537770         |
| 4      | 128     | Sigmoid             | LogCosh       | 0.01    | 0.656490910             | 0.713837010         |
| 4      | 128     | ReLU                | MAE           | 0.00    | 0.017021570             | 0.083774410         |
| 4      | 256     | ReLU                | MAE           | 0.00    | 0.029627020             | 0.048390410         |
| 5      | 128     | Tanhshrink          | LogCosh       | 0.01    | 9.999999999             | 9.999999999         |
| 5      | 128     | RReLU               | MSE+MAE       | 0.00    | 0.036556520             | 0.054125190         |
| 4      | 256     | ReLU                | MSE           | 0.00    | 0.001221960             | 0.065955870         |
| 5      | 128     | Leaky ReLU          | MSE           | 0.01    | 0.071020910             | 0.118922080         |
| 5      | 64      | Tanh                | MSE+MAE       | 0.00    | 0.021320290             | 0.038056540         |
| 5      | 128     | Leaky ReLU          | MSE+MAE       | 0.00    | 0.001953160             | 0.044955800         |
| 5      | 128     | Tanh                | LogCosh       | 0.05    | 0.534014200             | 0.515616370         |
| 5      | 256     | Sigmoid             | MAE           | 0.00    | 2.742521480             | 2.838006540         |
| 5      | 128     | SELU                | LogCosh       | 0.00    | 0.032226770             | 0.053437190         |
| 4      | 256     | CELU                | MAE           | 0.00    | 0.034502390             | 0.063281080         |
| 5      | 256     | RReLU               | LogCosh       | 0.00    | 0.121556160             | 0.131477550         |
| 3      | 128     | RReLU               | LogCosh       | 0.00    | 0.505236540             | 0.552226020         |
| 3      | 128     | ReLU                | MAE           | 0.00    | 0.024244380             | 0.077055360         |
| 4      | 32      | Sigmoid             | MAE           | 0.00    | 0.056026760             | 0.087484300         |
| 4      | 256     | ReLU                | LogCosh       | 0.01    | 0.171202140             | 0.181599520         |
| 5      | 128     | ReLU                | MAE           | 0.05    | 0.126414900             | 0.149547920         |
| 5      | 256     | Tanh                | MSE           | 0.00    | 0.038525670             | 0.044253440         |
| 5      | 64      | ReLU                | MAE           | 0.05    | 0.178048580             | 0.184771020         |
| 5      | 32      | Tanh                | LogCosh       | 0.05    | 0.170648770             | 0.186544950         |
| 5      | 128     | ReLU                | MSE+MAE       | 0.00    | 0.019375510             | 0.067992910         |
| 5      | 128     | RReLU               | LogCosh       | 0.01    | 0.275863940             | 0.278381930         |
| 4      | 128     | Sigmoid             | MAE           | 0.00    | 0.039371860             | 0.035245950         |
| 5      | 64      | ReLU                | LogCosh       | 0.00    | 0.007102880             | 0.053127150         |
| 4      | 256     | ReLU                | MSE+MAE       | 0.00    | 0.027942030             | 0.056231630         |
| 5      | 128     | Tanh                | MSE           | 0.00    | 0.012026620             | 0.037387790         |
| 5      | 128     | RReLU               | MAE           | 0.05    | 0.112849740             | 0.134798670         |
| 5      | 256     | RReLU               | MSE           | 0.00    | 0.045277070             | 0.057576930         |
| 5      | 128     | CELU                | MSE           | 0.00    | 0.003617820             | 0.045101560         |
| 4      | 128     | Tanhshrink          | LogCosh       | 0.00    | 9.999999999             | 9.999999999         |
| 3      | 64      | ReLU                | MAE           | 0.00    | 0.023432670             | 0.082240470         |
| 5      | 32      | Sigmoid             | LogCosh       | 0.05    | 0.153291340             | 0.168882560         |
| 5      | 32      | Tanhshrink          | MSE+MAE       | 0.00    | 2.761885030             | 2.599543900         |
| 5      | 256     | SELU                | LogCosh       | 0.01    | 0.550440350             | 0.631587340         |
| 5      | 128     | Tanh                | MSE+MAE       | 0.01    | 0.073421480             | 0.113590680         |

Continued on next page

Table S4 – Continued from previous page

| Layers | Neurons | Activation<br>Func. | Loss<br>Func. | Dropout | Performance<br>Training | Performance<br>Test |
|--------|---------|---------------------|---------------|---------|-------------------------|---------------------|
| 5      | 256     | CELU                | MSE           | 0.00    | 0.030675530             | 0.060089870         |
| 5      | 32      | Tanhshrink          | MAE           | 0.05    | 4.412677470             | 4.287058430         |
| 5      | 256     | SELU                | MSE+MAE       | 0.05    | 0.075563550             | 0.080276350         |
| 5      | 32      | Sigmoid             | MSE+MAE       | 0.00    | 2.747330410             | 2.684238140         |
| 5      | 64      | CELU                | MSE           | 0.00    | 0.036305770             | 0.046708640         |
| 5      | 256     | Tanhshrink          | MSE+MAE       | 0.00    | 9.999999999             | 9.999999999         |
| 3      | 128     | Sigmoid             | LogCosh       | 0.05    | 0.047734720             | 0.120873100         |
| 5      | 256     | Tanhshrink          | MAE           | 0.05    | 2.745595200             | 2.827288310         |
| 5      | 256     | SELU                | LogCosh       | 0.05    | 0.515861210             | 0.543625420         |
| 5      | 32      | Tanh                | LogCosh       | 0.00    | 0.012517780             | 0.033415450         |
| 5      | 256     | Leaky ReLU          | MSE+MAE       | 0.00    | 0.018022070             | 0.044067330         |
| 5      | 128     | Tanhshrink          | MSE+MAE       | 0.05    | 2.757121930             | 2.627898940         |
| 5      | 256     | Tanh                | LogCosh       | 0.01    | 0.097008690             | 0.111512660         |
| 3      | 32      | Sigmoid             | LogCosh       | 0.00    | 0.046516150             | 0.047769490         |
| 3      | 256     | ReLU                | MSE+MAE       | 0.00    | 0.015989940             | 0.048940320         |
| 5      | 256     | Leaky ReLU          | MSE+MAE       | 0.05    | 0.106226250             | 0.112153160         |
| 5      | 128     | Sigmoid             | MSE           | 0.01    | 2.777008020             | 2.943130360         |
| 5      | 128     | RReLU               | LogCosh       | 0.05    | 0.229303390             | 0.215375560         |
| 4      | 64      | ReLU                | MAE           | 0.00    | 0.031699560             | 0.066728010         |
| 5      | 32      | Leaky ReLU          | MAE           | 0.00    | 0.043359920             | 0.063762120         |
| 3      | 256     | Tanh                | MSE           | 0.00    | 0.015555320             | 0.034141440         |
| 5      | 128     | Tanh                | MAE           | 0.00    | 2.755675840             | 2.755261280         |
| 5      | 256     | Leaky ReLU          | LogCosh       | 0.00    | 0.019402080             | 0.050034430         |
| 3      | 128     | Sigmoid             | MSE           | 0.00    | 0.000323340             | 0.062589260         |
| 3      | 256     | SELU                | MAE           | 0.00    | 0.035897180             | 0.039190850         |
| 5      | 128     | Leaky ReLU          | MAE           | 0.01    | 0.057982860             | 0.100748650         |
| 3      | 256     | Tanh                | LogCosh       | 0.05    | 0.084280990             | 0.100934190         |
| 5      | 128     | Sigmoid             | MSE+MAE       | 0.01    | 1.030789270             | 0.941872100         |
| 3      | 64      | ReLU                | MSE           | 0.00    | 0.031477630             | 0.059369500         |
| 5      | 256     | Sigmoid             | LogCosh       | 0.05    | 9.999999999             | 9.999999999         |
| 5      | 256     | Tanh                | MAE           | 0.00    | 0.037948170             | 0.043290640         |
| 5      | 256     | Leaky ReLU          | MAE           | 0.05    | 0.109857560             | 0.119878100         |
| 5      | 64      | Sigmoid             | MSE+MAE       | 0.00    | 0.038005490             | 0.040226030         |
| 3      | 64      | CELU                | MAE           | 0.00    | 0.041930630             | 0.049845510         |
| 5      | 32      | Sigmoid             | LogCosh       | 0.01    | 0.724041740             | 0.745168930         |
| 5      | 128     | SELU                | LogCosh       | 0.05    | 2.720189140             | 2.932994390         |
| 3      | 256     | Leaky ReLU          | MAE           | 0.00    | 0.029513830             | 0.047320900         |
| 5      | 128     | Tanh                | MSE+MAE       | 0.05    | 1.533308200             | 1.539373330         |
| 3      | 256     | ReLU                | MSE           | 0.00    | 0.000653240             | 0.055673670         |
| 5      | 32      | Tanhshrink          | MAE           | 0.00    | 2.760321540             | 2.773767940         |
| 3      | 256     | SELU                | LogCosh       | 0.00    | 9.999999999             | 9.999999999         |
